# Supplementary material
Source: publisher figshare collection journal article supplement (https://tandf.figshare.com/ndownloader/files/13782071)
Supplement: Supplementary file 1 [file 13782071]

##############################
### Supplementary materials for "Hierarchical testing of a primary and a secondary endpoint in a group sequential design with different information times"
### Authors: Jiangtao Gou and Dong Xi
### Program developer: Jiangtao Gou
### Date: 2017-06-24 (version Alpha) 
###       2017-09-02 (version Beta) 
###       2018-08-08 (version 1.0)
###       2018-08-12 (version 1.1)
##############################
# Main Function 1: gs.dsgn.diff.info.times.Kp2.Ks2
# Main Function 2: gs.dsgn.diff.info.times.partially.ld.Kp2.Ks3
##############################
### Examples
### Example 1
# gs.dsgn.diff.info.times.Kp2.Ks2(alpha=0.025,tp=0.5,ts=0.6,ldtag=TRUE,strategytype='Stagewise',pOBF=TRUE,sOBF=FALSE,paraIntvl=c(0.0125,0.5),dltIntvl=c(-1,5))
### Example 2
# gs.dsgn.diff.info.times.Kp2.Ks2(alpha=0.025,tp=0.5,ts=0.8,ldtag=TRUE,strategytype='Overall',pOBF=TRUE,sOBF=FALSE,paraIntvl=c(0.0125,0.5),dltIntvl=c(-1,5))
### Example 3
# gs.dsgn.diff.info.times.Kp2.Ks2(alpha=0.025,alphaX=0.0125,tp=0.5,ts=0.8,ldtag=TRUE,strategytype='Partially',pOBF=TRUE,sOBF=TRUE)
### Example 4
# gs.dsgn.diff.info.times.Kp2.Ks2(alpha=0.025,tp=0.5,ts=0.6,ldtag=FALSE,strategytype='Stagewise',pOBF=TRUE,sOBF=FALSE,paraIntvl=c(1,4),dltIntvl=c(-1,5))
### Example 5
# gs.dsgn.diff.info.times.Kp2.Ks2(alpha=0.025,tp=0.5,ts=0.6,ldtag=FALSE,strategytype='Overall',pOBF=TRUE,sOBF=FALSE,paraIntvl=c(1,4),dltIntvl=c(-1,5))
### Example 6
# gs.dsgn.diff.info.times.Kp2.Ks2(alpha=0.025,alphaX=0.0125,tp=0.5,ts=0.8,ldtag=FALSE,strategytype='Partially',pOBF=TRUE,sOBF=TRUE,paraIntvl=c(1,4))
### Example 7
# gs.dsgn.diff.info.times.partially.ld.Kp2.Ks3(alpha=0.025,alphaX=0.0125,tp=0.6,ts1=0.21,ts2=0.44,pOBF=TRUE,sOBF=FALSE)
### Example 8
# gs.dsgn.diff.info.times.partially.ld.Kp2.Ks3(alpha=0.025,alphaX=0.0125,tp=0.6,ts1=0.21,ts2=0.44,pOBF=TRUE,sOBF=TRUE)
##############################

require(mvtnorm)
require(ldbounds)
require(gsrsb)

cat("If the primary and secondary hypothesis have the same information fractions, please switch to R package gsrsb.\n")

###
# Main Function 1
# Calculate critical boundaries for Hierarchical testing of a primary and a secondary endpoint in a group sequential design with different information times
# Input: alpha --- Level of significance
#        alphaX --- Level of significance assigned to the primary hypothesis (only for partially Hierarchical strategy)
#        tp --- Information fraction of the primary hypothesis at the interim stage
#        ts --- Information fraction of the secondary hypothesis at the interim stage
#        ldtag --- True for error spending approach, False for the original approach
#        strategytype --- Stagewise, Overall, Partially
#        pOBF --- Primary hypothesis, True for OBF, False for POC
#        sOBF --- Secondary hypothesis, True for OBF, False for POC
#        paraIntvl --- Optimization tuning parameter for marginal error rate or critical boundary
#        dltIntvl --- Optimization tuning parameter for Delta
# Output: cvec --- Primary boundary
#         dvec --- Refined Secondary boundary
###
gs.dsgn.diff.info.times.Kp2.Ks2 <- function (alpha,alphaX=alpha/2,tp,ts,ldtag,strategytype,pOBF,sOBF,paraIntvl,dltIntvl=c(-1,5)) {
  if (ldtag) {
    if (pOBF) {
      bounds.c.output <- bounds(t=c(tp,1),iuse=1,alpha=alpha)
      cvec <- bounds.c.output$upper.bounds
    } else {
      bounds.c.output <- bounds(t=c(tp,1),iuse=2,alpha=alpha)
      cvec <- bounds.c.output$upper.bounds
    } #
    if (strategytype == 'Stagewise') {
      sBndyLD.result <- sBndyLD(alpha=alpha,tp=tp,ts=ts,pOBF=pOBF,sOBF=sOBF,alphaYIntvl=paraIntvl, dltIntvl=dltIntvl)
      dvec <- sBndyLD.result$dvec
      output <- list(cvec=cvec,dvec=dvec)
      return (output)
    } else if (strategytype == 'Overall') {
      sBndyOHLD.result <- sBndyOHLD(alpha=alpha,tp=tp,ts=ts,pOBF=pOBF,sOBF=sOBF,alphaYIntvl=paraIntvl, dltIntvl=dltIntvl)
      dvec <- sBndyOHLD.result$dvec
      output <- list(cvec=cvec,dvec=dvec)
      return (output)
    } else if (strategytype == 'Partially') {
      if (pOBF) {
        bounds.c.output <- bounds(t=c(tp,1),iuse=1,alpha=alphaX)
        cvec <- bounds.c.output$upper.bounds
      } else {
        bounds.c.output <- bounds(t=c(tp,1),iuse=2,alpha=alphaX)
        cvec <- bounds.c.output$upper.bounds
      } #
      if (sOBF) {
        sBndyPHLD.result <- phSecondaryBoundary(alpha=alpha,alphaX=alphaX,tYvec=c(ts-0.01,ts+0.01,1),type="ldOBF")
      } else {
        sBndyPHLD.result <- phSecondaryBoundary(alpha=alpha,alphaX=alphaX,tYvec=c(ts-0.01,ts+0.01,1),type="ldPOC")
      }
      dvec.temp <- sBndyPHLD.result$secondaryBoundary
      dvec <- c(mean(dvec.temp[1:2]),dvec.temp[3])
      output <- list(cvec=cvec,dvec=dvec)
      return (output)
    } else {
      stop('strategy types inclue 1. Stagewise, 2. Overall, and 3. Partially.')
    } # End of if strategytype
  } else {
    cvec <- pBndy(alpha=alpha,t=tp,OBF=pOBF,initIntvl=paraIntvl)
    #
    if (strategytype == 'Stagewise') {
      sBndy.result <- sBndy(alpha=alpha,tp=tp,ts=ts,pOBF=pOBF,sOBF=sOBF,initIntvl=paraIntvl,dltIntvl=dltIntvl)
      dvec <- sBndy.result$dvec
      output <- list(cvec=cvec,dvec=dvec)
      return (output)  
    } else if (strategytype == 'Overall') {
      sBndyOH.result <- sBndyOH(alpha=alpha,tp=tp,ts=ts,pOBF=pOBF,sOBF=sOBF,initIntvl=paraIntvl,dltIntvl=dltIntvl)
      dvec <- sBndyOH.result$dvec
      output <- list(cvec=cvec,dvec=dvec)
      return (output)      
    } else if (strategytype == 'Partially') {
      cvec <- pBndy(alpha=alphaX,t=tp,OBF=pOBF,initIntvl=paraIntvl)
      if (sOBF) {
        sBndyPHLD.result <- phSecondaryBoundary(alpha=alpha,alphaX=alphaX,tYvec=c(ts,1),type="OBF")
      } else {
        sBndyPHLD.result <- phSecondaryBoundary(alpha=alpha,alphaX=alphaX,tYvec=c(ts,1),type="POC")
      }
      dvec <- sBndyPHLD.result$secondaryBoundary
      output <- list(cvec=cvec,dvec=dvec)
      return (output)
    } else {
      stop('strategy types inclue 1. Stagewise, 2. Overall, and 3. Partially.')
    } # End of if strategytype
  } # End of if ldtag
}

###
# Main Function 2
# Calculate critical boundaries for Hierarchical testing of a primary and a secondary endpoint in a group sequential design with different information times, partially Hierarchical Design
# Input: alpha --- Level of significance
#        alphaX --- Level of significance assigned to the primary hypothesis, for partially Hierarchical strategy
#        tp --- Information fraction of the primary hypothesis at the interim stage
#        ts1 --- First Information fraction of the secondary hypothesis at the interim stage
#        ts2 --- Second Information fraction of the secondary hypothesis at the interim stage
#        ldtag --- True for error spending approach, False for the original approach
#        pOBF --- Primary hypothesis, True for OBF (error spending approach), False for POC (error spending approach)
#        sOBF --- Secondary hypothesis, True for OBF (error spending approach), False for POC (error spending approach)
# Output: cvec --- Primary boundary
#         dvec --- Refined Secondary boundary
###
gs.dsgn.diff.info.times.partially.ld.Kp2.Ks3 <- function(alpha,alphaX=alpha/2,tp,ts1,ts2,pOBF,sOBF) {
  if (pOBF) {
    bounds.c.output <- bounds(t=c(tp,1),iuse=1,alpha=alpha)
    cvec <- bounds.c.output$upper.bounds
  } else {
    bounds.c.output <- bounds(t=c(tp,1),iuse=2,alpha=alpha)
    cvec <- bounds.c.output$upper.bounds
  } #
  if (sOBF) {
    sBndyPHLD.result <- phSecondaryBoundary(alpha=alpha,alphaX=alphaX,tYvec=c(ts1,ts2,1),type="ldOBF")
  } else {
    sBndyPHLD.result <- phSecondaryBoundary(alpha=alpha,alphaX=alphaX,tYvec=c(ts1,ts2,1),type="ldPOC")
  }
  dvec <- sBndyPHLD.result$secondaryBoundary
  output <- list(cvec=cvec,dvec=dvec)
  return (output)
}


###
# Subroutine 1
# Function: Primary boundary, original approach
###
pBndy <- function(alpha,t,OBF,initIntvl=c(1,4)) {
  target <- function(c,alpha,t,OBF) {
    lowerB <- c(-Inf, -Inf)
    if (OBF == TRUE) {
      upperB <- c(c/sqrt(t),c)
    } else {
      upperB <- c(c,c)
    }
    meanV <- rep(0,2)
    corrM <- matrix(c(1,sqrt(t),sqrt(t),1),nrow=2)
    resultIntgl <- pmvnorm(lowerB, upperB, meanV, corrM, algorithm=Miwa(steps=128))
    result <- resultIntgl[1]
    return(result - 1 + alpha);
  }
  result<- uniroot(target, lower=initIntvl[1], upper=initIntvl[2], tol=2.5e-16, t=t, alpha=alpha, OBF=OBF)
  c2 <- result$root
  if (OBF == TRUE) {
    cvec <- c(c2/sqrt(t),c2)
  } else {
    cvec <- c(c2,c2)
  }
  return(cvec)
}

###
# Subroutine 2
# Function: Secondary boundary, Stagewise hierarchical strategy, original approach
###
sBndy <- function(alpha,tp,ts,pOBF,sOBF,initIntvl=c(1,4),dltIntvl=c(-1,10)) {
  cat("Function parameter 'dltIntvl' may need to be tuned in order to have accurate results. \n" )
  cvec <- pBndy(alpha,tp,pOBF,initIntvl)
  dvecInit <- pBndy(alpha,ts,sOBF,initIntvl)
  errorRate <- function(dlt,alpha,cvec,dvec,tp,ts) {
    lowerB <- c(cvec[1],dvec[1])
    upperB <- c(Inf, Inf)
    meanV <- c(sqrt(tp)*dlt,0)
    corrM <- matrix(c(1,sqrt(min(tp/ts,ts/tp)),sqrt(min(tp/ts,ts/tp)),1),nrow=2)
    part1 <- pmvnorm(lowerB, upperB, meanV, corrM, algorithm=Miwa(steps=128))
    lowerB <- c(-Inf,max(cvec[2],dvec[2]+dlt))
    upperB <- c(cvec[1], Inf)
    meanV <- c(sqrt(tp)*dlt,dlt)
    corrM <- matrix(c(1,sqrt(tp),sqrt(tp),1),nrow=2)
    part2 <- pmvnorm(lowerB, upperB, meanV, corrM, algorithm=Miwa(steps=128))
    result <- part1[1]+part2[1]
    return(result)
  }
  diffErrorRate <- function(alpha,cvec,dvec,tp,ts) {
    aMax <- optimize(errorRate,interval=dltIntvl,alpha=alpha,cvec=cvec,dvec=dvec,tp=tp,ts=ts,maximum=TRUE,tol=.Machine$double.eps^0.95)
    dltMax <- aMax$maximum
    diffAlpha = aMax$objective - alpha
    result <- list(dltMax=dltMax,diffAlpha=diffAlpha)
    return(result)
  }
  targetDiff <- function(d2,alpha,cvec,tp,ts,sOBF) {
    if (sOBF == TRUE) {
      dvec <- c(d2/sqrt(ts),d2)
    } else {
      dvec <- c(d2,d2)
    }
    resultList <- diffErrorRate(alpha=alpha,cvec=cvec,dvec=dvec,tp=tp,ts=ts)
    return(resultList$diffAlpha)
  }
  nomErrorRate <- function(c,alpha,t,OBF) {
    lowerB <- c(-Inf, -Inf)
    if (OBF == TRUE) {
      upperB <- c(c/sqrt(t),c)
    } else {
      upperB <- c(c,c)
    }
    meanV <- rep(0,2)
    corrM <- matrix(c(1,sqrt(t),sqrt(t),1),nrow=2)
    resultIntgl <- pmvnorm(lowerB, upperB, meanV, corrM, algorithm=Miwa(steps=128))
    result <- resultIntgl[1]
    return(1-result);
  }
  finalResult <- uniroot(targetDiff,lower=initIntvl[1],upper=initIntvl[2],tol=2.5e-16,alpha=alpha,cvec=cvec,tp=tp,ts=ts,sOBF=sOBF)
  if (sOBF == TRUE) {
    dvec <- c(finalResult$root/sqrt(ts),finalResult$root)
  } else {
    dvec <- c(finalResult$root,finalResult$root)
  }
  nomAlpha <- nomErrorRate(c=finalResult$root,alpha=alpha,t=ts,OBF=sOBF)
  dltResult <- diffErrorRate(alpha=alpha,cvec=cvec,dvec=dvec,tp=tp,ts=ts)
  output <- list(dvec=dvec,nomAlpha=nomAlpha, dltMax=dltResult$dltMax)
  return(output)
}

###
# Subroutine 3
# Function: Secondary boundary, Overall hierarchical strategy, original approach
###
sBndyOH <- function(alpha,tp,ts,pOBF,sOBF,initIntvl=c(1,4),dltIntvl=c(-1,5)) {
  cat("Results depend on the function parameter 'dltIntvl'. If there is no knowledge on DeltaX, you may specify a wide interval. \n" )
  cvec <- pBndy(alpha,tp,pOBF,initIntvl)
  dvecInit <- pBndy(alpha,ts,sOBF,initIntvl)
  errorRate <- function(dlt,alpha,cvec,dvec,tp,ts) {
    lowerB <- c(cvec[1],dvec[1])
    upperB <- c(Inf, Inf)
    meanV <- c(sqrt(tp)*dlt,0)
    corrM <- matrix(c(1,sqrt(min(tp/ts,ts/tp)),sqrt(min(tp/ts,ts/tp)),1),nrow=2)
    part1 <- pmvnorm(lowerB, upperB, meanV, corrM, algorithm=Miwa(steps=128))
    lowerB <- c(-Inf,max(cvec[2],dvec[2]+dlt))
    upperB <- c(cvec[1], Inf)
    meanV <- c(sqrt(tp)*dlt,dlt)
    corrM <- matrix(c(1,sqrt(tp),sqrt(tp),1),nrow=2)
    part2 <- pmvnorm(lowerB, upperB, meanV, corrM, algorithm=Miwa(steps=128))
    lowerB <- c(cvec[1],-Inf, dvec[2])
    upperB <- c(Inf,dvec[1],Inf)
    meanV <- c(sqrt(tp)*dlt,0,0)
    corrM <- matrix(c(1,sqrt(min(tp/ts,ts/tp)),sqrt(tp), sqrt(min(tp/ts,ts/tp)),1,sqrt(ts), sqrt(tp),sqrt(ts),1),nrow=3)
    part3 <- pmvnorm(lowerB, upperB, meanV, corrM, algorithm=Miwa(steps=128))
    result <- part1[1]+part2[1]+part3[1]
    return(result)
  }
  diffErrorRate <- function(alpha,cvec,dvec,tp,ts) {
    aMax <- optimize(errorRate,interval=dltIntvl,alpha=alpha,cvec=cvec,dvec=dvec,tp=tp,ts=ts,maximum=TRUE,tol=.Machine$double.eps^0.95)
    dltMax <- aMax$maximum
    diffAlpha = aMax$objective - alpha
    result <- list(dltMax=dltMax,diffAlpha=diffAlpha)
    return(result)
  }
  targetDiff <- function(d2,alpha,cvec,tp,ts,sOBF) {
    if (sOBF == TRUE) {
      dvec <- c(d2/sqrt(ts),d2)
    } else {
      dvec <- c(d2,d2)
    }
    resultList <- diffErrorRate(alpha=alpha,cvec=cvec,dvec=dvec,tp=tp,ts=ts)
    return(resultList$diffAlpha)
  }
  nomErrorRate <- function(c,t,OBF) {
    lowerB <- c(-Inf, -Inf)
    if (OBF == TRUE) {
      upperB <- c(c/sqrt(t),c)
    } else {
      upperB <- c(c,c)
    }
    meanV <- rep(0,2)
    corrM <- matrix(c(1,sqrt(t),sqrt(t),1),nrow=2)
    resultIntgl <- pmvnorm(lowerB, upperB, meanV, corrM, algorithm=Miwa(steps=128))
    result <- resultIntgl[1]
    return(1-result);
  }
  finalResult <- uniroot(targetDiff,lower=initIntvl[1],upper=initIntvl[2],tol=2.5e-16,alpha=alpha,cvec=cvec,tp=tp,ts=ts,sOBF=sOBF)
  if (sOBF == TRUE) {
    dvec <- c(finalResult$root/sqrt(ts),finalResult$root)
  } else {
    dvec <- c(finalResult$root,finalResult$root)
  }
  nomAlpha <- nomErrorRate(c=finalResult$root,t=ts,OBF=sOBF)
  dltResult <- diffErrorRate(alpha=alpha,cvec=cvec,dvec=dvec,tp=tp,ts=ts)
  output <- list(dvec=dvec,nomAlpha=nomAlpha, dltMax=dltResult$dltMax)
  return(output)
}

###
# Subroutine 4
# Function: Secondary boundary, Partially hierarchical strategy
###
phSecondaryBoundary <- function(alpha,alphaX,tYvec,type="ldOBF"){
  # type: "ldOBF","ldPOC","ldOBFexhst","ldPOCexhst","exhaustSigLvl","OBF","POC"
  cat("Partially Hierachical Strategy.\n")
  # print("Partially Hierachical Strategy. Primary Endpoint: 2 looks; Secondary Endpoint: 2 or 3 looks")
  try(if(length(tYvec) >= 4) stop("Secondary Endpoint: 2 or 3 looks"))
  nYlook <- length(tYvec)
  dvec <- rep(0,times=nYlook)
  if (nYlook == 2) {
    if (type == "exhaustSigLvl") {
      dvec[2] <- qnorm((alpha-alphaX)/(1-alphaX),lower.tail=FALSE)
      ## Function "d1Bndy"
      d1Bndy <- function(alpha,t,c2,initIntvl=c(1,4)) {
        target <- function(c1,alpha,t,c2) {
          lowerB <- c(-Inf, -Inf)
          upperB <- c(c1,c2)
          meanV <- rep(0,2)
          corrM <- matrix(c(1,sqrt(t),sqrt(t),1),nrow=2)
          resultIntgl <- pmvnorm(lowerB, upperB, meanV, corrM, algorithm=Miwa(steps=128))
          result <- resultIntgl[1]
          return(result - 1 + alpha);
        }
        result<- uniroot(target, lower=initIntvl[1], upper=initIntvl[2], tol=2.5e-16, t=t, alpha=alpha, c2=c2)
        c1 <- result$root
        return(c1)
      } ## End of Function "d1Bndy"
      dvec[1] <- d1Bndy(alpha=alpha,t=tYvec[1],c2=dvec[2])
      nomErrorY <- alpha
    } # End of if (type == "exhaustSigLvl")
    if ((type=="OBF") || (type=="POC")) {
      ## Function "nomErrorRate"
      nomErrorRate <- function(c,t,OBF) {
        lowerB <- c(-Inf, -Inf)
        if (OBF == TRUE) {
          upperB <- c(c/sqrt(t),c)
        } else {
          upperB <- c(c,c)
        }
        meanV <- rep(0,2)
        corrM <- matrix(c(1,sqrt(t),sqrt(t),1),nrow=2)
        resultIntgl <- pmvnorm(lowerB, upperB, meanV, corrM, algorithm=Miwa(steps=128))
        result <- resultIntgl[1]
        return(1-result);
      } ## End of Function "nomErrorRate"
      if (type=="OBF") {
        dvec[2] <- qnorm((alpha-alphaX)/(1-alphaX),lower.tail=FALSE)
        nomErrorY <- nomErrorRate(c=dvec[2],t=tYvec[1],OBF=TRUE)
        dvec[1] <- dvec[2]/sqrt(tYvec[1])
      } # End of if (type=="OBF")
      if (type=="POC") {
        dvec[2] <- qnorm((alpha-alphaX)/(1-alphaX),lower.tail=FALSE)
        nomErrorY <- nomErrorRate(c=dvec[2],t=tYvec[1],OBF=FALSE)
        dvec[1] <- dvec[2]
      } # End of if (type=="POC")
    } # End of if ((type=="OBF") || (type=="POC"))
  } # End of if (nYlook == 2)
  if (nYlook == 3) {
    ldnomError <- function(alpha.nom,type,t,alpha,alphaX) {
      listbounds <- bounds(t=t,iuse=type,alpha=alpha.nom)
      dvec.temp <- listbounds$upper.bounds
      gammaVec <- sqrt(t[2:3])
      lowerB <- rep(-Inf,2)
      upperB <- dvec.temp[2:3]
      meanV <- rep(0,2)
      corrM <- genCorrMat(gammaVec,1)
      result <- pmvnorm(lowerB,upperB,meanV,corrM,algorithm=Miwa(steps=128))
      diff <- (1 - (alpha-alphaX)/(1-alphaX)) - result[1]
      return(diff)
    } ## End of Function "ldnomError"
    target.find.d1 <- function(d1,alpha,t,d2,d3) {
      gammaVec <- sqrt(t)
      lowerB <- rep(-Inf,3)
      upperB <- c(d1,d2,d3)
      meanV <- rep(0,3)
      corrM <- genCorrMat(gammaVec,1)
      result <- pmvnorm(lowerB,upperB,meanV,corrM,algorithm=Miwa(steps=128))
      diff <- (1-result[1]) - alpha
      return(diff)
    } ## End of Function "target.find.d1"
    if ((type == "ldOBF") || (type == "ldOBFexhst")) {
      listbounds <- bounds(t=tYvec,iuse = 1,alpha=alpha-alphaX)
      dvec.ref.lower <- listbounds$upper.bounds
      listbounds <- bounds(t=tYvec,iuse = 1,alpha=alpha)
      dvec.ref.upper <- listbounds$upper.bounds
      result<- uniroot(ldnomError,lower=alpha-alphaX,upper=alpha,tol=2.5e-16,t=tYvec,alpha=alpha,alphaX=alphaX,type=1)
      # print(result) # DeBug 2018-08-12
      nomErrorY <- result$root
      listbounds <- bounds(t=tYvec,iuse=1,alpha=nomErrorY)
      dvec <- listbounds$upper.bounds
      if (type == "ldOBFexhst") {
        result<- uniroot(target.find.d1,lower=1,upper=10,tol=2.5e-16,t=tYvec,alpha=alpha,d2=dvec[2],d3=dvec[3])
        dvec[1] <- result$root
        nomErrorY <- alpha
      } # End of if (type == "ldOBFexhst")
    } # End of if ((type == "ldOBF") || (type == "ldOBFexhst"))
    if ((type == "ldPOC") || (type == "ldPOCexhst")) {
      listbounds <- bounds(t=tYvec,iuse=2,alpha=alpha-alphaX)
      dvec.ref.lower <- listbounds$upper.bounds
      listbounds <- bounds(t=tYvec,iuse=2,alpha=alpha)
      dvec.ref.upper <- listbounds$upper.bounds
      result<- uniroot(ldnomError,lower=alpha-alphaX,upper=alpha,tol=2.5e-16,t=tYvec,alpha=alpha,alphaX=alphaX,type=2)
      nomErrorY <- result$root
      listbounds <- bounds(t=tYvec,iuse=2,alpha=nomErrorY)
      dvec <- listbounds$upper.bounds
      if (type == "ldPOCexhst") {
        result<- uniroot(target.find.d1,lower=1,upper=10,tol=2.5e-16,t=tYvec,alpha=alpha,d2=dvec[2],d3=dvec[3])
        dvec[1] <- result$root
        nomErrorY <- alpha
      } # End of if (type == "ldPOCexhst")
    } # End of if ((type == "ldPOC") || (type == "ldPOCexhst"))
  } # End of if (nYlook == 3)
  resultlist <- list("secondaryBoundary" = dvec, "nomialSignificance" = nomErrorY)
  return(resultlist)
}

###
# Subroutine 5
# Function: Secondary boundary, Stagewise hierarchical strategy, Error Spending approach
###
sBndyLD <- function(alpha,tp,ts,pOBF,sOBF,alphaYIntvl = c(alpha/2,0.5), dltIntvl=c(-1,10)) {
  cat("Function parameter 'dltIntvl' and 'alphaYIntvl' may need to be tuned in order to have accurate results. \n" )
  if (pOBF) {
    iusep <- 1
  } else {
    iusep <- 2
  }
  if (sOBF) {
    iuses <- 1
  } else {
    iuses <- 2
  }
  bounds.c.output <- bounds(t=c(tp,1),iuse=iusep,alpha=alpha)
  cvec <- bounds.c.output$upper.bounds
  bounds.d.init.output <- bounds(t=c(ts,1),iuse=iuses,alpha=alpha)
  dvecInit <- bounds.d.init.output$upper.bounds
  #
  errorRate <- function(dlt,alpha,cvec,dvec,tp,ts) {
    lowerB <- c(cvec[1],dvec[1])
    upperB <- c(Inf, Inf)
    meanV <- c(sqrt(tp)*dlt,0)
    corrM <- matrix(c(1,sqrt(min(tp/ts,ts/tp)),sqrt(min(tp/ts,ts/tp)),1),nrow=2)
    part1 <- pmvnorm(lowerB, upperB, meanV, corrM, algorithm=Miwa(steps=128))
    lowerB <- c(-Inf,max(cvec[2],dvec[2]+dlt))
    upperB <- c(cvec[1], Inf)
    meanV <- c(sqrt(tp)*dlt,dlt)
    corrM <- matrix(c(1,sqrt(tp),sqrt(tp),1),nrow=2)
    part2 <- pmvnorm(lowerB, upperB, meanV, corrM, algorithm=Miwa(steps=128))
    result <- part1[1]+part2[1]
    return(result)
  }
  diffErrorRate <- function(alpha,cvec,dvec,tp,ts) {
    aMax <- optimize(errorRate,interval=dltIntvl,alpha=alpha,cvec=cvec,dvec=dvec,tp=tp,ts=ts,maximum=TRUE,tol=.Machine$double.eps^0.95)
    dltMax <- aMax$maximum
    diffAlpha = aMax$objective - alpha
    result <- list(dltMax=dltMax,diffAlpha=diffAlpha)
    return(result)
  }
  targetDiff <- function(alphaY,alpha,cvec,tp,ts,sOBF) {
    if (sOBF == TRUE) {
      bounds.d.output <- bounds(t=c(ts,1),iuse=1,alpha=alphaY)
      dvec <- bounds.d.output$upper.bounds
    } else {
      bounds.d.output <- bounds(t=c(ts,1),iuse=2,alpha=alphaY)
      dvec <- bounds.d.output$upper.bounds
    }
    resultList <- diffErrorRate(alpha=alpha,cvec=cvec,dvec=dvec,tp=tp,ts=ts)
    return(resultList$diffAlpha)
  }
  nomErrorRate <- function(cvec,alpha,t,OBF) {
    lowerB <- c(-Inf, -Inf)
    if (OBF == TRUE) {
      upperB <- cvec
    } else {
      upperB <- cvec
    }
    meanV <- rep(0,2)
    corrM <- matrix(c(1,sqrt(t),sqrt(t),1),nrow=2)
    resultIntgl <- pmvnorm(lowerB, upperB, meanV, corrM, algorithm=Miwa(steps=128))
    result <- resultIntgl[1]
    return(1-result);
  }
  finalResult <- uniroot(targetDiff,lower=alphaYIntvl[1],upper=alphaYIntvl[2],tol=2.5e-16,alpha=alpha,cvec=cvec,tp=tp,ts=ts,sOBF=sOBF)
  if (sOBF == TRUE) {
    bounds.d.output <- bounds(t=c(ts,1),iuse=1,alpha=finalResult$root)
    dvec <- bounds.d.output$upper.bounds
  } else {
    bounds.d.output <- bounds(t=c(ts,1),iuse=2,alpha=finalResult$root)
    dvec <- bounds.d.output$upper.bounds
  }
  nomAlpha <- nomErrorRate(cvec=dvec,alpha=alpha,t=ts,OBF=sOBF)
  dltResult <- diffErrorRate(alpha=alpha,cvec=cvec,dvec=dvec,tp=tp,ts=ts)
  output <- list(dvec=dvec,nomAlpha=nomAlpha, dltMax=dltResult$dltMax)
  return(output)
}

###
# Subroutine 6
# Function: Secondary boundary, Overall hierarchical strategy, error spending function approach
###
sBndyOHLD <- function(alpha,tp,ts,pOBF,sOBF,alphaYIntvl = c(alpha/2,0.5), dltIntvl=c(-1,10)) {
  cat("Function parameter 'dltIntvl' and 'alphaYIntvl' may need to be tuned in order to have accurate results. \n" )
  if (pOBF) {
    iusep <- 1
  } else {
    iusep <- 2
  }
  if (sOBF) {
    iuses <- 1
  } else {
    iuses <- 2
  }
  bounds.c.output <- bounds(t=c(tp,1),iuse=iusep,alpha=alpha)
  cvec <- bounds.c.output$upper.bounds
  bounds.d.init.output <- bounds(t=c(ts,1),iuse=iuses,alpha=alpha)
  dvecInit <- bounds.d.init.output$upper.bounds
  #
  errorRate <- function(dlt,alpha,cvec,dvec,tp,ts) {
    lowerB <- c(cvec[1],dvec[1])
    upperB <- c(Inf, Inf)
    meanV <- c(sqrt(tp)*dlt,0)
    corrM <- matrix(c(1,sqrt(min(tp/ts,ts/tp)),sqrt(min(tp/ts,ts/tp)),1),nrow=2)
    part1 <- pmvnorm(lowerB, upperB, meanV, corrM, algorithm=Miwa(steps=128))
    lowerB <- c(-Inf,max(cvec[2],dvec[2]+dlt))
    upperB <- c(cvec[1], Inf)
    meanV <- c(sqrt(tp)*dlt,dlt)
    corrM <- matrix(c(1,sqrt(tp),sqrt(tp),1),nrow=2)
    part2 <- pmvnorm(lowerB, upperB, meanV, corrM, algorithm=Miwa(steps=128))
    lowerB <- c(cvec[1],-Inf, dvec[2])
    upperB <- c(Inf,dvec[1],Inf)
    meanV <- c(sqrt(tp)*dlt,0,0)
    corrM <- matrix(c(1,sqrt(min(tp/ts,ts/tp)),sqrt(tp), sqrt(min(tp/ts,ts/tp)),1,sqrt(ts), sqrt(tp),sqrt(ts),1),nrow=3)
    part3 <- pmvnorm(lowerB, upperB, meanV, corrM, algorithm=Miwa(steps=128))
    result <- part1[1]+part2[1]+part3[1]
    return(result)
  }
  diffErrorRate <- function(alpha,cvec,dvec,tp,ts) {
    aMax <- optimize(errorRate,interval=dltIntvl,alpha=alpha,cvec=cvec,dvec=dvec,tp=tp,ts=ts,maximum=TRUE,tol=.Machine$double.eps^0.95)
    dltMax <- aMax$maximum
    diffAlpha = aMax$objective - alpha
    result <- list(dltMax=dltMax,diffAlpha=diffAlpha)
    return(result)
  }
  targetDiff <- function(alphaY,alpha,cvec,tp,ts,sOBF) {
    if (sOBF == TRUE) {
      bounds.d.output <- bounds(t=c(ts,1),iuse=1,alpha=alphaY)
      dvec <- bounds.d.output$upper.bounds
    } else {
      bounds.d.output <- bounds(t=c(ts,1),iuse=2,alpha=alphaY)
      dvec <- bounds.d.output$upper.bounds
    }
    resultList <- diffErrorRate(alpha=alpha,cvec=cvec,dvec=dvec,tp=tp,ts=ts)
    return(resultList$diffAlpha)
  }
  nomErrorRate <- function(cvec,alpha,t,OBF) {
    lowerB <- c(-Inf, -Inf)
    if (OBF == TRUE) {
      upperB <- cvec
    } else {
      upperB <- cvec
    }
    meanV <- rep(0,2)
    corrM <- matrix(c(1,sqrt(t),sqrt(t),1),nrow=2)
    resultIntgl <- pmvnorm(lowerB, upperB, meanV, corrM, algorithm=Miwa(steps=128))
    result <- resultIntgl[1]
    return(1-result);
  }
  finalResult <- uniroot(targetDiff,lower=alphaYIntvl[1],upper=alphaYIntvl[2],tol=2.5e-16,alpha=alpha,cvec=cvec,tp=tp,ts=ts,sOBF=sOBF)
  if (sOBF == TRUE) {
    bounds.d.output <- bounds(t=c(ts,1),iuse=1,alpha=finalResult$root)
    dvec <- bounds.d.output$upper.bounds
  } else {
    bounds.d.output <- bounds(t=c(ts,1),iuse=2,alpha=finalResult$root)
    dvec <- bounds.d.output$upper.bounds
  }
  nomAlpha <- nomErrorRate(cvec=dvec,alpha=alpha,t=ts,OBF=sOBF)
  dltResult <- diffErrorRate(alpha=alpha,cvec=cvec,dvec=dvec,tp=tp,ts=ts)
  output <- list(dvec=dvec,nomAlpha=nomAlpha, dltMax=dltResult$dltMax)
  return(output)
}
###
